# Supplementary material for: Association between Infancy BMI Peak and Body Composition and Blood Pressure at Age 5–6 Years
Source: PubMed Central journal article supplement (PMC3851737; doi:10.1371/journal.pone.0080517), 2013-12-04
Supplement: pone.0080517.s001.pdf [file pone.0080517.s001.pdf]

| Outcome                   | Covariate                             | Boys     |            |         | Girls    |            |         |
|---------------------------|---------------------------------------|----------|------------|---------|----------|------------|---------|
|                           |                                       | Estimate | Std. Error | P-value | Estimate | Std. Error | P-value |
| BMI (kg m <sup>-2</sup> ) | Intercept                             | 15.497   | 0.042      | —       | 15.403   | 0.048      | —       |
|                           | BMI at 9 months (kg m <sup>-2</sup> ) | 0.498    | 0.033      | < 0.001 | 0.492    | 0.034      | < 0.001 |
|                           | Birth weight (kg)                     | 0.300    | 0.097      | 0.002   | 0.352    | 0.113      | 0.002   |
|                           | Pregnancy duration (days)             | 0.001    | 0.006      | 0.839   | -0.011   | 0.006      | 0.076   |
| Waist to Height ratio     | Intercept                             | 45.209   | 0.094      | —       | 44.608   | 0.101      | —       |
|                           | BMI at 9 months (kg m <sup>-2</sup> ) | 0.724    | 0.073      | < 0.001 | 0.686    | 0.072      | < 0.001 |
|                           | Birth weight (kg)                     | -0.139   | 0.214      | 0.517   | 0.179    | 0.239      | 0.453   |
|                           | Pregnancy duration (days)             | 0.001    | 0.012      | 0.948   | -0.013   | 0.013      | 0.300   |
| Fat percentage (%)        | Intercept                             | 19.427   | 0.203      | —       | 21.335   | 0.217      | —       |
|                           | BMI at 9 months (kg m <sup>-2</sup> ) | 1.281    | 0.159      | < 0.001 | 1.399    | 0.154      | < 0.001 |
|                           | Birth weight (kg)                     | 1.457    | 0.462      | 0.002   | 0.668    | 0.512      | 0.193   |
|                           | Pregnancy duration (days)             | -0.007   | 0.027      | 0.796   | -0.054   | 0.027      | 0.047   |
