# Supplementary material for: Association between Infancy BMI Peak and Body Composition and Blood Pressure at Age 5–6 Years
Source: PubMed Central journal article supplement (PMC3851737; doi:10.1371/journal.pone.0080517), 2013-12-04
Supplement: pone.0080517.s002.pdf [file pone.0080517.s002.pdf]

Systolic blood pressure

| Outcome | Covariate                                        | Boys     |            |         | Girls    |            |         |
|---------|--------------------------------------------------|----------|------------|---------|----------|------------|---------|
|         |                                                  | Estimate | Std. Error | P-value | Estimate | Std. Error | P-value |
| Model 1 | Intercept                                        | 99.043   | 0.306      | —       | 98.371   | 0.294      | —       |
|         | BMI at 9 months (kg m <sup>-2</sup> )            | 0.640    | 0.240      | 0.008   | 0.588    | 0.209      | 0.005   |
|         | Birth weight (kg)                                | -1.795   | 0.698      | 0.010   | -0.481   | 0.694      | 0.488   |
|         | Pregnancy duration (days)                        | 0.034    | 0.040      | 0.399   | -0.015   | 0.037      | 0.678   |
| Model 2 | Intercept                                        | 99.027   | 0.301      | —       | 98.318   | 0.291      | —       |
|         | BMI at 9 months (kg m <sup>-2</sup> )            | 0.642    | 0.236      | 0.007   | 0.515    | 0.208      | 0.013   |
|         | Birth weight (kg)                                | -2.73    | 0.715      | < 0.001 | -1.175   | 0.706      | 0.097   |
|         | Pregnancy duration (days)                        | 0.046    | 0.040      | 0.250   | -0.001   | 0.037      | 0.974   |
| Model 3 | Intercept                                        | 99.015   | 0.297      | —       | 98.326   | 0.286      | —       |
|         | BMI at 9 months (kg m <sup>-2</sup> )            | 0.053    | 0.268      | 0.845   | -0.030   | 0.229      | 0.895   |
|         | Birth weight (kg)                                | -2.981   | 0.708      | < 0.001 | -1.403   | 0.696      | 0.044   |
|         | Pregnancy duration (days)                        | 0.045    | 0.039      | 0.254   | 0.009    | 0.036      | 0.808   |
|         | Height at outcome measurement (cm)               | 0.273    | 0.065      | < 0.001 | 0.211    | 0.064      | 0.001   |
|         | BMI at outcome measurement (kg m <sup>-2</sup> ) | 1.195    | 0.270      | < 0.001 | 1.136    | 0.216      | < 0.001 |
