# Supplementary material for: Association between Infancy BMI Peak and Body Composition and Blood Pressure at Age 5–6 Years
Source: PubMed Central journal article supplement (PMC3851737; doi:10.1371/journal.pone.0080517), 2013-12-04
Supplement: pone.0080517.s003.pdf [file pone.0080517.s003.pdf]

Diastolic blood pressure

| Outcome | Covariate                                        | Boys     |            |         | Girls    |            |         |
|---------|--------------------------------------------------|----------|------------|---------|----------|------------|---------|
|         |                                                  | Estimate | Std. Error | P-value | Estimate | Std. Error | P-value |
| Model 1 | Intercept                                        | 59.085   | 0.311      | —       | 60.227   | 0.285      | —       |
|         | BMI at 9 months (kg m <sup>-2</sup> )            | 0.344    | 0.244      | 0.158   | 0.221    | 0.203      | 0.275   |
|         | Birth weight (kg)                                | -1.007   | 0.709      | 0.156   | -1.657   | 0.673      | 0.014   |
|         | Pregnancy duration (days)                        | 0.047    | 0.041      | 0.246   | 0.031    | 0.036      | 0.386   |
| Model 2 | Intercept                                        | 59.078   | 0.31       | —       | 60.205   | 0.284      | —       |
|         | BMI at 9 months (kg m <sup>-2</sup> )            | 0.345    | 0.243      | 0.156   | 0.191    | 0.203      | 0.348   |
|         | Birth weight (kg)                                | -1.392   | 0.736      | 0.059   | -1.950   | 0.691      | 0.005   |
|         | Pregnancy duration (days)                        | 0.052    | 0.041      | 0.202   | 0.037    | 0.036      | 0.303   |
| Model 3 | Height at outcome measurement (cm)               | 0.127    | 0.068      | 0.060   | 0.112    | 0.062      | 0.072   |
|         | Intercept                                        | 59.07    | 0.308      | —       | 60.212   | 0.281      | —       |
|         | BMI at 9 months (kg m <sup>-2</sup> )            | -0.041   | 0.279      | 0.882   | -0.272   | 0.225      | 0.228   |
|         | Birth weight (kg)                                | -1.557   | 0.735      | 0.035   | -2.144   | 0.684      | 0.002   |
|         | Pregnancy duration (days)                        | 0.052    | 0.041      | 0.205   | 0.045    | 0.035      | 0.200   |
|         | Height at outcome measurement (cm)               | 0.103    | 0.068      | 0.128   | 0.066    | 0.063      | 0.294   |
|         | BMI at outcome measurement (kg m <sup>-2</sup> ) | 0.784    | 0.281      | 0.005   | 0.963    | 0.212      | < 0.001 |
